# Supplementary material for: Stability and Transformation of Metabolic Syndrome in Adolescents: A Prospective Assessment in Relation to the Change of Cardiometabolic Risk Factors
Source: MDPI journal article supplement (doi:10.3390/nu14040744), 2022-02-10
Supplement: s1 [file s1]

**Supplementary Table S1.** Diagnostic criteria for the determination of metabolic syndrome defined by IDF, TPA, JIS-Adult, and IDF–TPA

| MetS criteria                            | MetS abnormal components                                                                                                   |                                                                                 |              |                                       |                                                                                                             | Diagnostic criteria for MetS         |
|------------------------------------------|----------------------------------------------------------------------------------------------------------------------------|---------------------------------------------------------------------------------|--------------|---------------------------------------|-------------------------------------------------------------------------------------------------------------|--------------------------------------|
|                                          | Abdominal obesity                                                                                                          | Low HDL-C                                                                       | Increased TG | High FPG                              | Elevated blood pressure                                                                                     |                                      |
| <b>IDF (for 10-18 yrs) [23]</b>          | WC ≥90 percentile (or adult cutoff if lower) <sup>1</sup>                                                                  | <40 mg/dL (10-15 years); <40 mg/dL in males, <50 mg/dL in females (16-18 years) | ≥150 mg/dL   | ≥100 mg/dL (or diagnosed T2DM before) | SBP ≥130 / DBP ≥85 mmHg (or antihypertensive drug treatment)                                                | <b>Central obesity + 2 other RCs</b> |
| <b>TPA (for 8-18 yrs) [24]</b>           | BMI >95 percentile for age-sex-specific groups <sup>2</sup>                                                                | <40 mg/dL in males, <50 mg/dL in females                                        | ≥150 mg/dL   | ≥100 mg/dL (or diagnosed T2DM before) | SBP ≥130 / DBP ≥85 mmHg (or SBP/DBP > 95 percentile for age-sex-specific groups)                            | <b>Central obesity + 2 other RCs</b> |
| <b>JIS-Ad (for Asians ≥18 years) [6]</b> | WC ≥90 cm in males, WC ≥80 cm in females <sup>3</sup>                                                                      | <40 mg/dL in males, <50 mg/dL in females                                        | ≥150 mg/dL   | ≥100 mg/dL (or diagnosed T2DM before) | SBP ≥130 / DBP ≥85 mmHg (or antihypertensive drug treatment)                                                | <b>Any 3 or more RCs</b>             |
| <b>IDF–TPA (for 12-18 yrs) [15,26]</b>   | WC ≥90 percentile (or adult cutoff if lower) <sup>1</sup> , or BMI >95 percentile for age-sex-specific groups <sup>2</sup> | <40 mg/dL in males, <50 mg/dL in females                                        | ≥150 mg/dL   | ≥100 mg/dL (or diagnosed T2DM before) | SBP ≥130 / DBP ≥85 mmHg (or SBP/DBP > 95 percentile for age-sex-specific groups, use antihypertensive drug) | <b>Central obesity + 2 other RCs</b> |

**Abbreviation:** MetS, metabolic syndrome; HDL-C, high-density lipoprotein cholesterol; TG, triglyceride; FPG, fasting plasma glucose; IDF, International Diabetes Federation; TPA, Taiwan Pediatric Association; JIS-Ad, Joint Interim Statement of MetS for adults; WC, waist circumference; BMI, body mass index; SBP, systolic blood pressure; DBP, diastolic blood pressure; T2DM, type 2 diabetes; RC, risk component.

<sup>1</sup>If BMI is > 30kg/m<sup>2</sup>, abdominal obesity can be assumed, waist circumference does not need to be considered.

<sup>2</sup>The cut-off points of abdominal obesity for age-sex-specific adolescents are defined by the TPA.

<sup>3</sup>The WC thresholds (i.e., WC ≥90 cm in males and ≥80 cm in females) suggested for Asian adult abdominal obesity were applied.

<sup>4</sup>The combined MetS criteria were used to include adolescents who meet the IDF or TPA criteria.

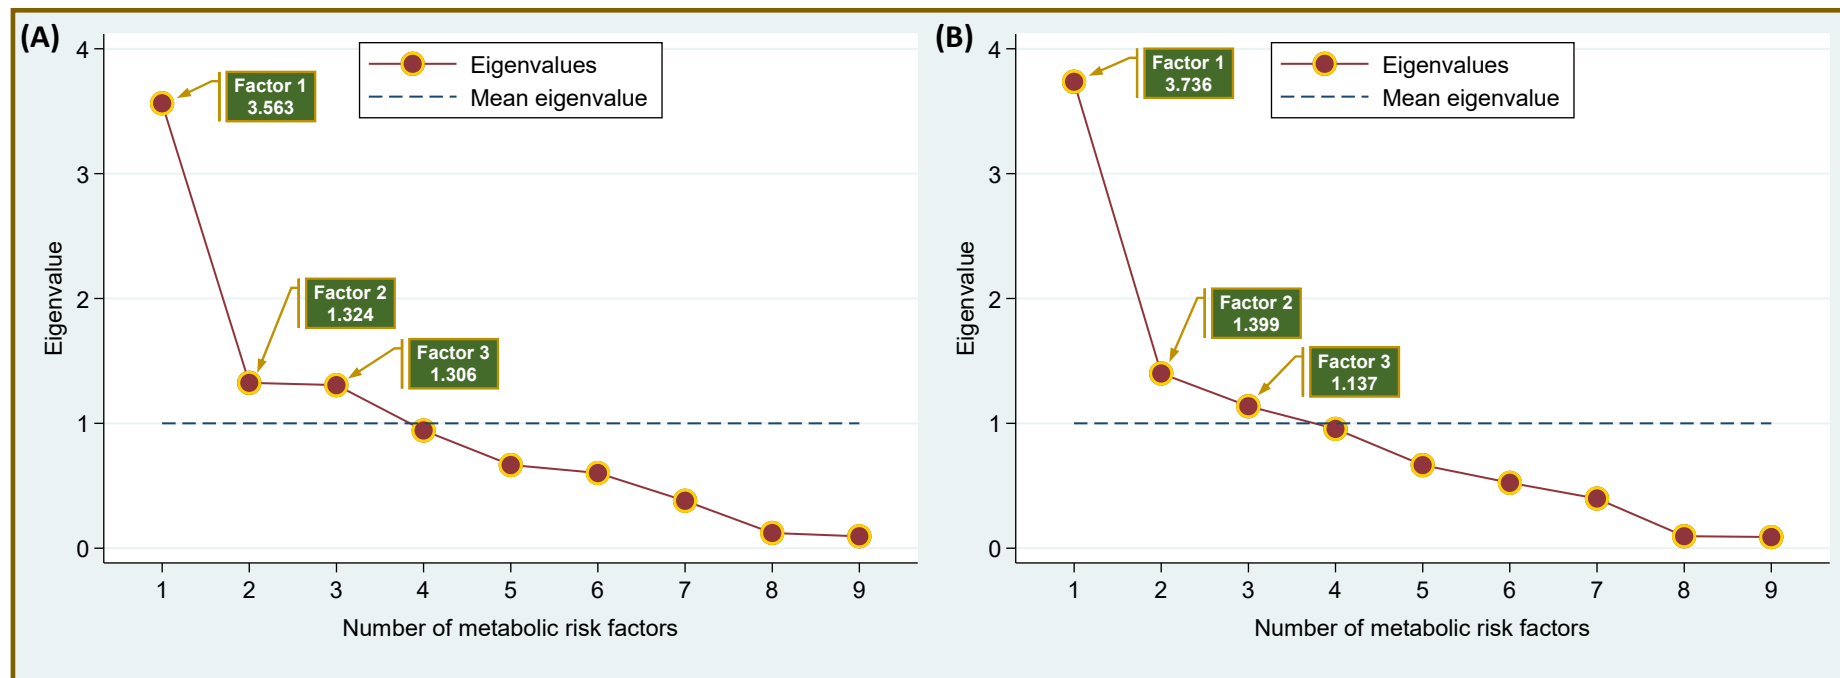

**Supplementary Figure S1.** Scree plots for exploratory factor analysis of 9 metabolic risk variables measured at (A) baseline and (B) follow-up, respectively.

**Note:** There were three factors in that their eigenvalues were >1 and surpassed the break in the scree plots at baseline and follow-up, respectively.
